# Supplementary material
Source: publisher figshare collection journal article supplement (https://acs.figshare.com/ndownloader/files/5713350)
Supplement: Supplementary file 1 [file 5713350]

## Supporting Information

### Legend to the deposited figures

**Figure S1.** Spectrophotometric titration of the formed  $\text{La}(\text{NMHA})^{2+}$ ,  $I = 2 \text{ M}$  ( $\text{NaClO}_4$ ) at  $25^\circ\text{C}$ ,  $\text{pH} = 6.52$  (top) -  $3.75$  (bottom),  $[\text{La}(\text{III})] = 0.004 \text{ M}$ ,  $[\text{NMHA}] = 0.00024 \text{ M}$ .

**Figure S2.** Spectrophotometric titration of the formed  $\text{Cu}(\text{NMHA})^+$ ,  $I = 2 \text{ M}$  ( $\text{NaClO}_4$ ) at  $25^\circ\text{C}$ ,  $\text{pH} = 3.64$  (top) -  $0.85$  (bottom),  $[\text{Cu}(\text{II})] = 0.04 \text{ M}$ ,  $[\text{NMHA}] = 0.004 \text{ M}$ .

**Figure S3.** Plot of  $k_{\text{obs}}$  vs.  $[\text{HAc}]$  for complexation of  $\text{Cu}(\text{II})$  with  $\text{NMHA}$  at  $25^\circ\text{C}$ ,  $[\text{Cu}(\text{II})] = 0.04 \text{ M}$ ,  $[\text{NMHA}] = 0.004 \text{ M}$ ,  $I = 2 \text{ M}$ , ( $\text{NaClO}_4$ ),  $\text{pH} = 4.55$  in all cases.

**Figure S4.** Plot of  $k_{\text{obs}}$  vs.  $[\text{Cu}(\text{II})]$  for complexation of  $\text{Cu}(\text{II})$  with  $\text{NMHA}$  at  $25^\circ\text{C}$ ,  $[\text{NMHA}] = 0.004 \text{ M}$ ,  $\text{pH} = 4.35$  (acetate buffer),  $I = 2 \text{ M}$ , ( $\text{NaClO}_4$ ).

**Figure S5.** Plot of  $k_{\text{obs}}$  vs.  $[\text{La}(\text{III})]$  for complexation of  $\text{La}(\text{III})$  with  $\text{NMHA}$  at  $25^\circ\text{C}$ ,  $[\text{NMHA}] = 0.002 \text{ M}$ ,  $\text{pH} = 7.55$  (HEPES buffer),  $I = 2 \text{ M}$ , ( $\text{NaClO}_4$ ).

**Figure S6.** Plot of  $k_{\text{obs}}$  vs.  $\text{pH}$  for complexation of  $\text{Cu}(\text{II})$  with  $\text{NMHA}$  at  $25^\circ\text{C}$ ,  $[\text{Cu}(\text{II})] = 0.04 \text{ M}$ ,  $[\text{NMHA}] = 0.004 \text{ M}$ ,  $[\text{HAc}] = 0.4 \text{ M}$ ,  $I = 2 \text{ M}$ , ( $\text{NaClO}_4$ ) (full circles), and  $k_{\text{obs}}$  vs.

pH, at 25 °C, [Cu(II)] = 0.05 M, [H<sub>4</sub>dfb<sup>+</sup>] = 0.005 M, [HAc]=0.4 M, *I* = 2 M, (NaClO<sub>4</sub>) (empty circles).

**Figure S7.** Plot of  $k_{\text{obs}}$  vs. pH for complexation of La(III) with NMHA at 25 °C, [La(III)] = 0.01 M, [NMHA] = 0.001 M, [HEPES]= 0.01 M, *I* = 2 M, (NaClO<sub>4</sub>) (full circles), and  $k_{\text{obs}}$  vs. pH at 25 °C, [La(III)] = 0.001 M, [H<sub>4</sub>dfb<sup>+</sup>] = 0.0001 M, [HEPES]= 0.01 M, *I* = 2 M, (NaClO<sub>4</sub>) (empty circles).

**Figure S8.** Eyring plots for complexation of La(III) (full circles) and Cu(II) (open circles) with NMHA. Conditions are: [La(III)] = 0.01 M, [NMHA] = 0.001 M, pH = 7.55 (HEPES buffer), *I* = 2 M, (NaClO<sub>4</sub>) and [Cu(II)] = 0.04 M, [NMHA] = 0.004 M, pH = 4.35 (acetate buffer), *I* = 2 M, (NaClO<sub>4</sub>).

**Figure S9.** Eyring plots for complexation of La(III) (full circles) and Cu(II) (open circles) with H<sub>4</sub>dfb<sup>+</sup>. Conditions are: [La(III)] = 0.01 M, [H<sub>4</sub>dfb<sup>+</sup>] = 0.0005 M, pH = 7.55 (HEPES buffer), *I* = 2 M, (NaClO<sub>4</sub>) and [Cu(II)] = 0.1 M, [H<sub>4</sub>dfb<sup>+</sup>] = 0.005 M, pH = 4.35 (acetate buffer), *I* = 2 M, (NaClO<sub>4</sub>).

**Figure S10.** Eyring plots for the rotation about the hydroxamate C-N bond in NMHA (open circles) and H<sub>4</sub>dfb<sup>+</sup> (C-terminal, full circles).

Fig. S1

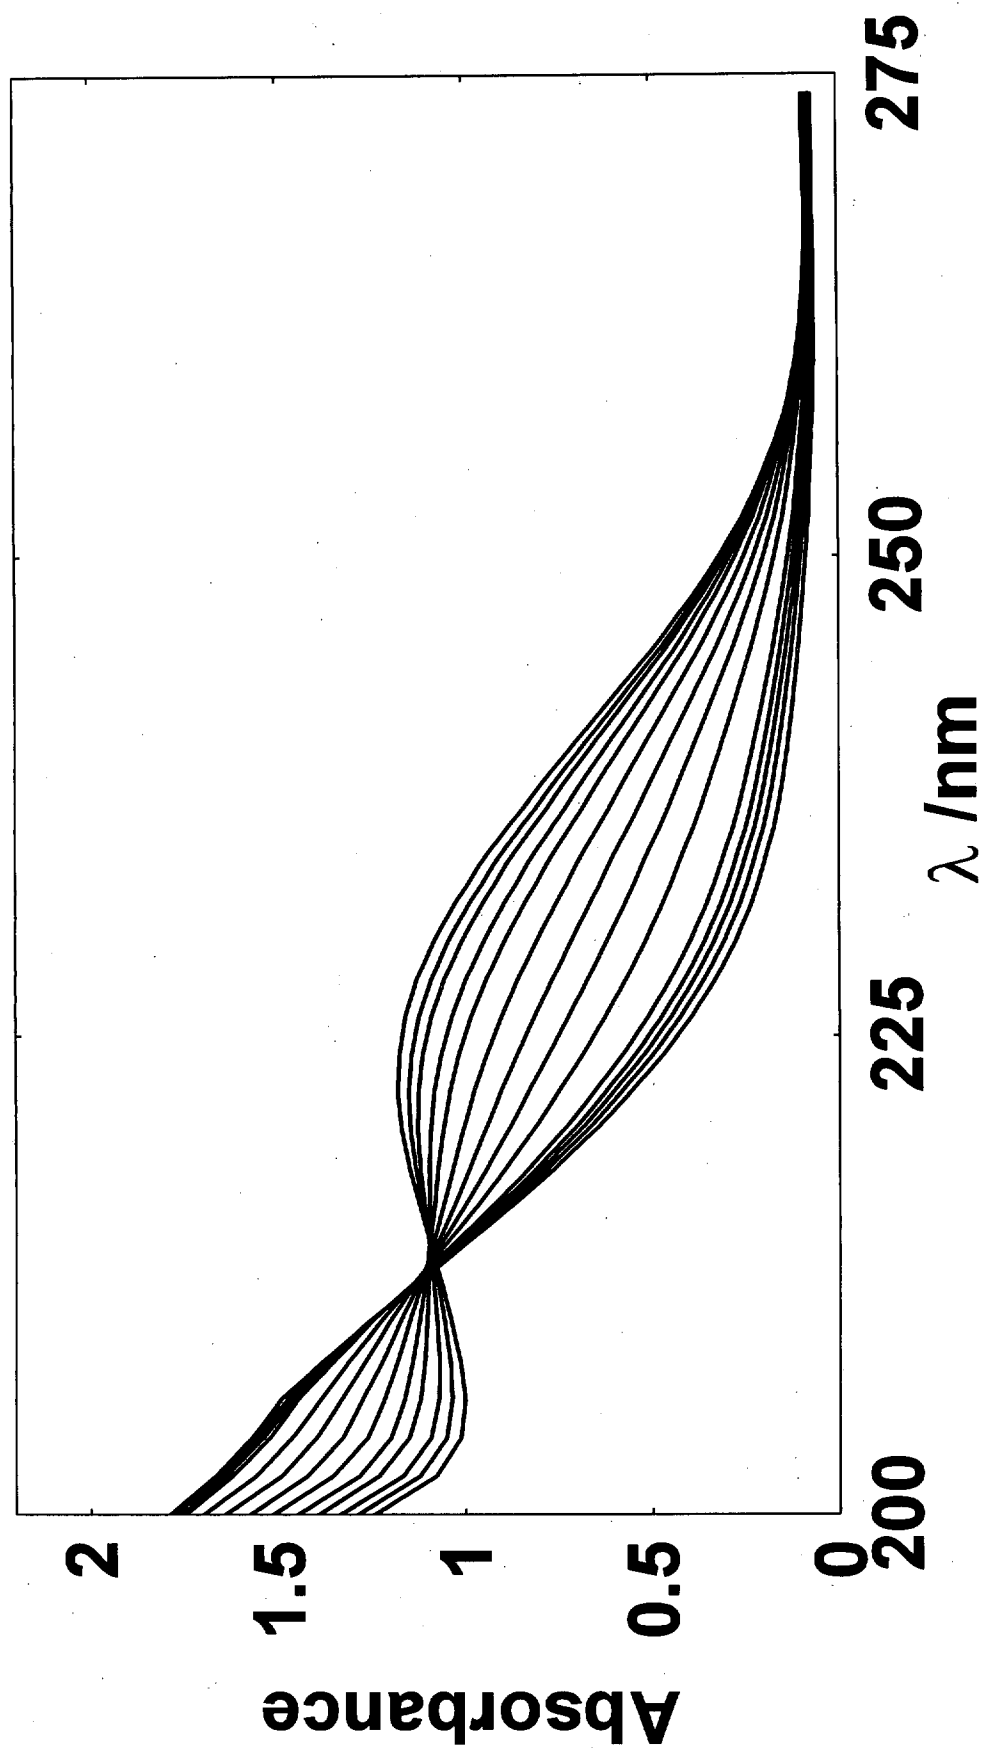

Fig. S2

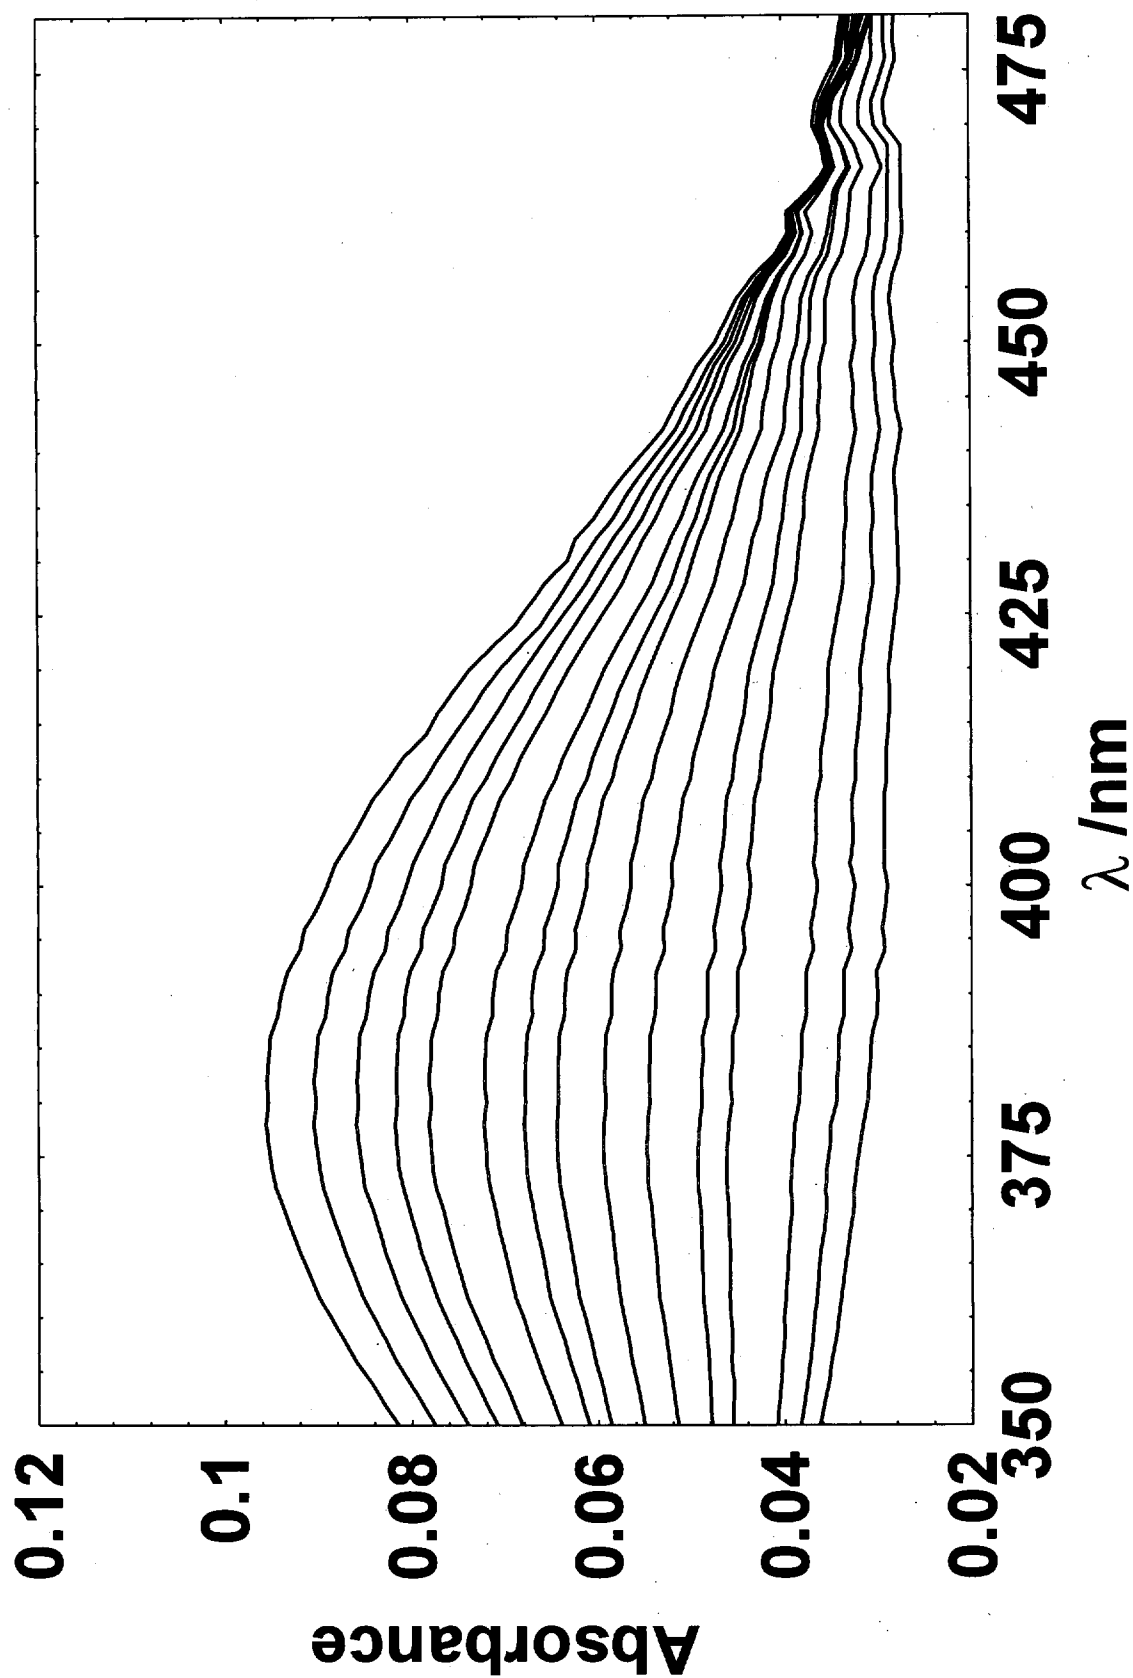

S5

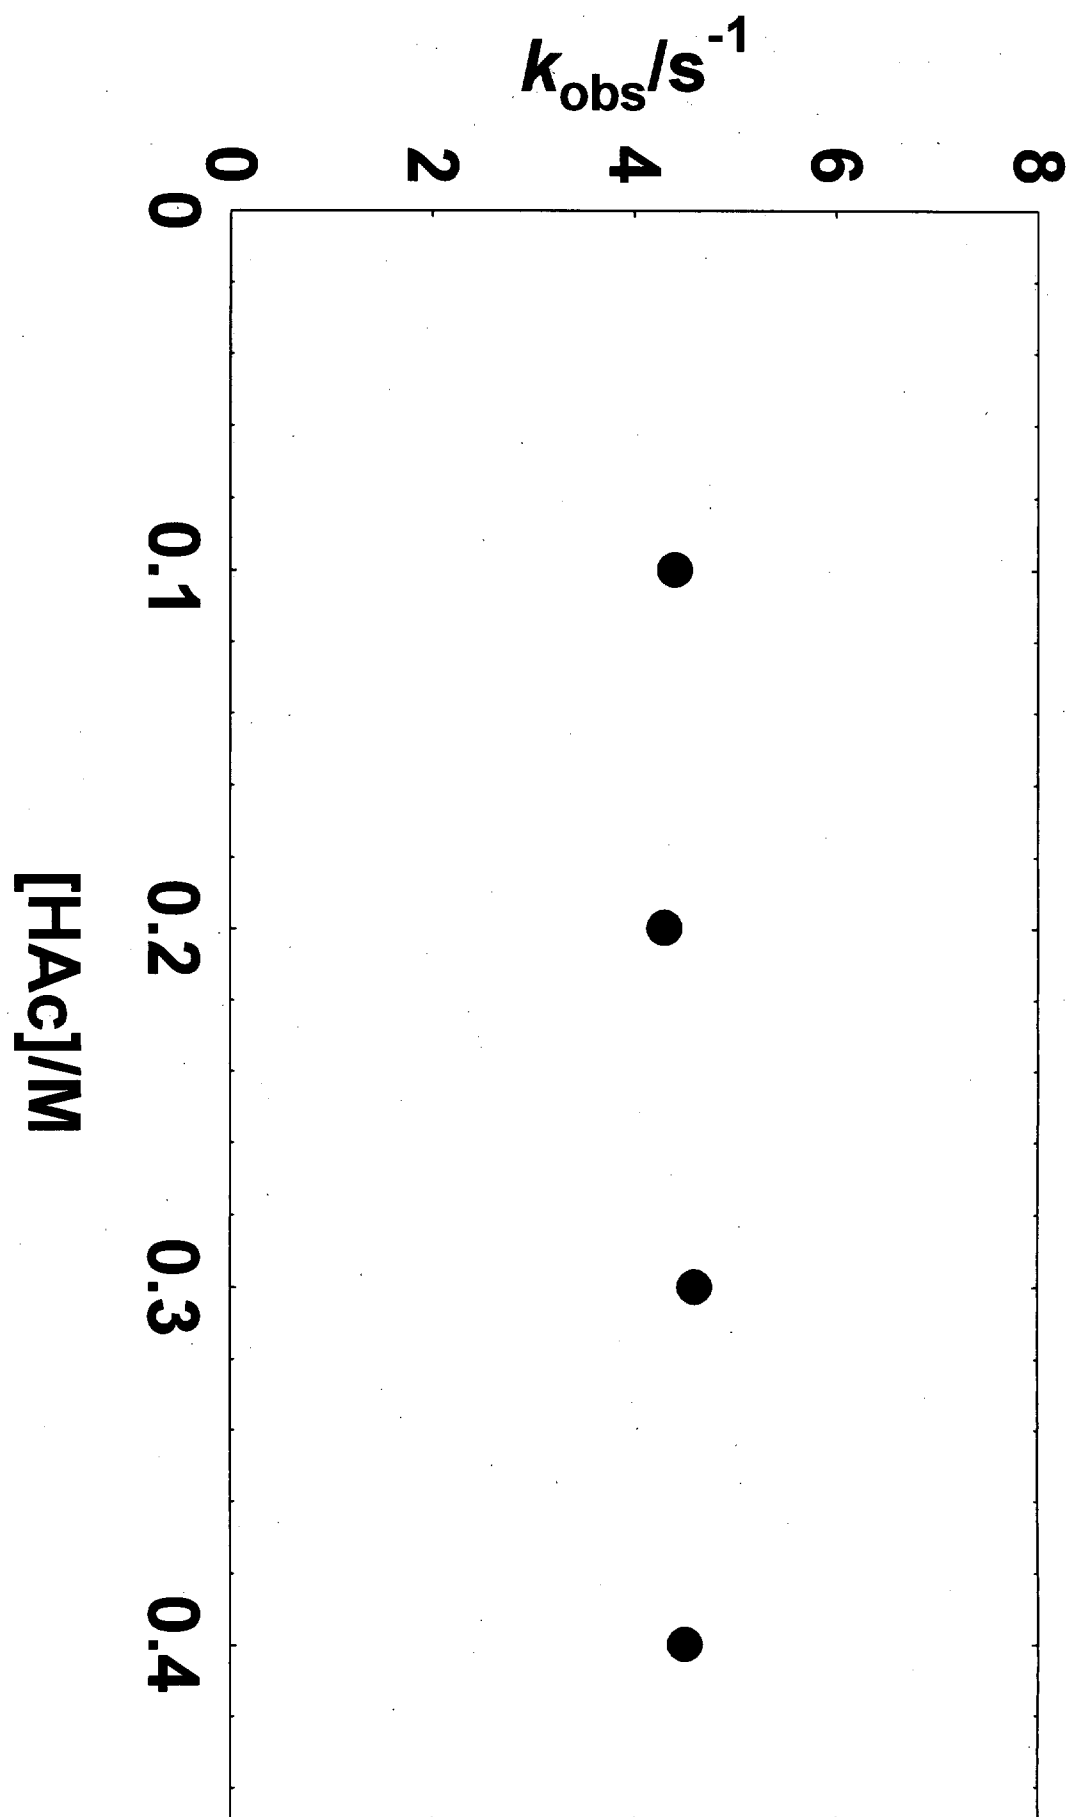

Fig. S3

S6

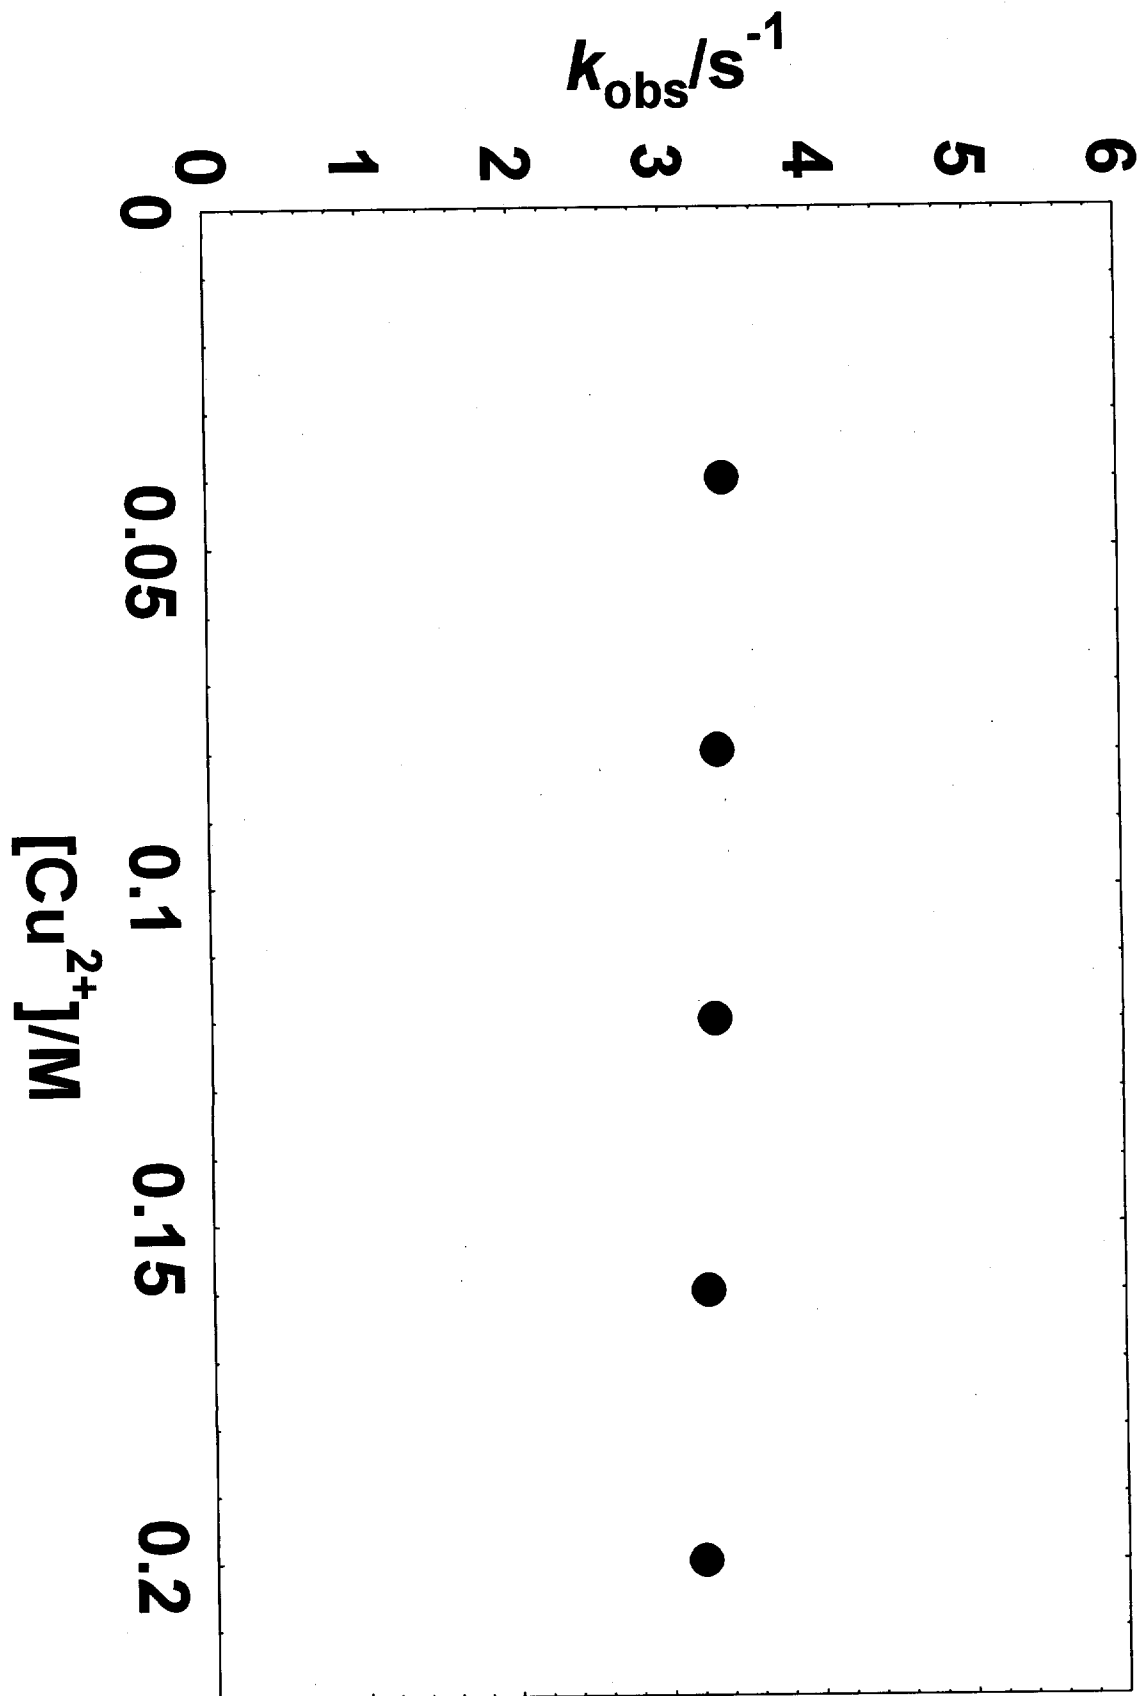

Fig. S4

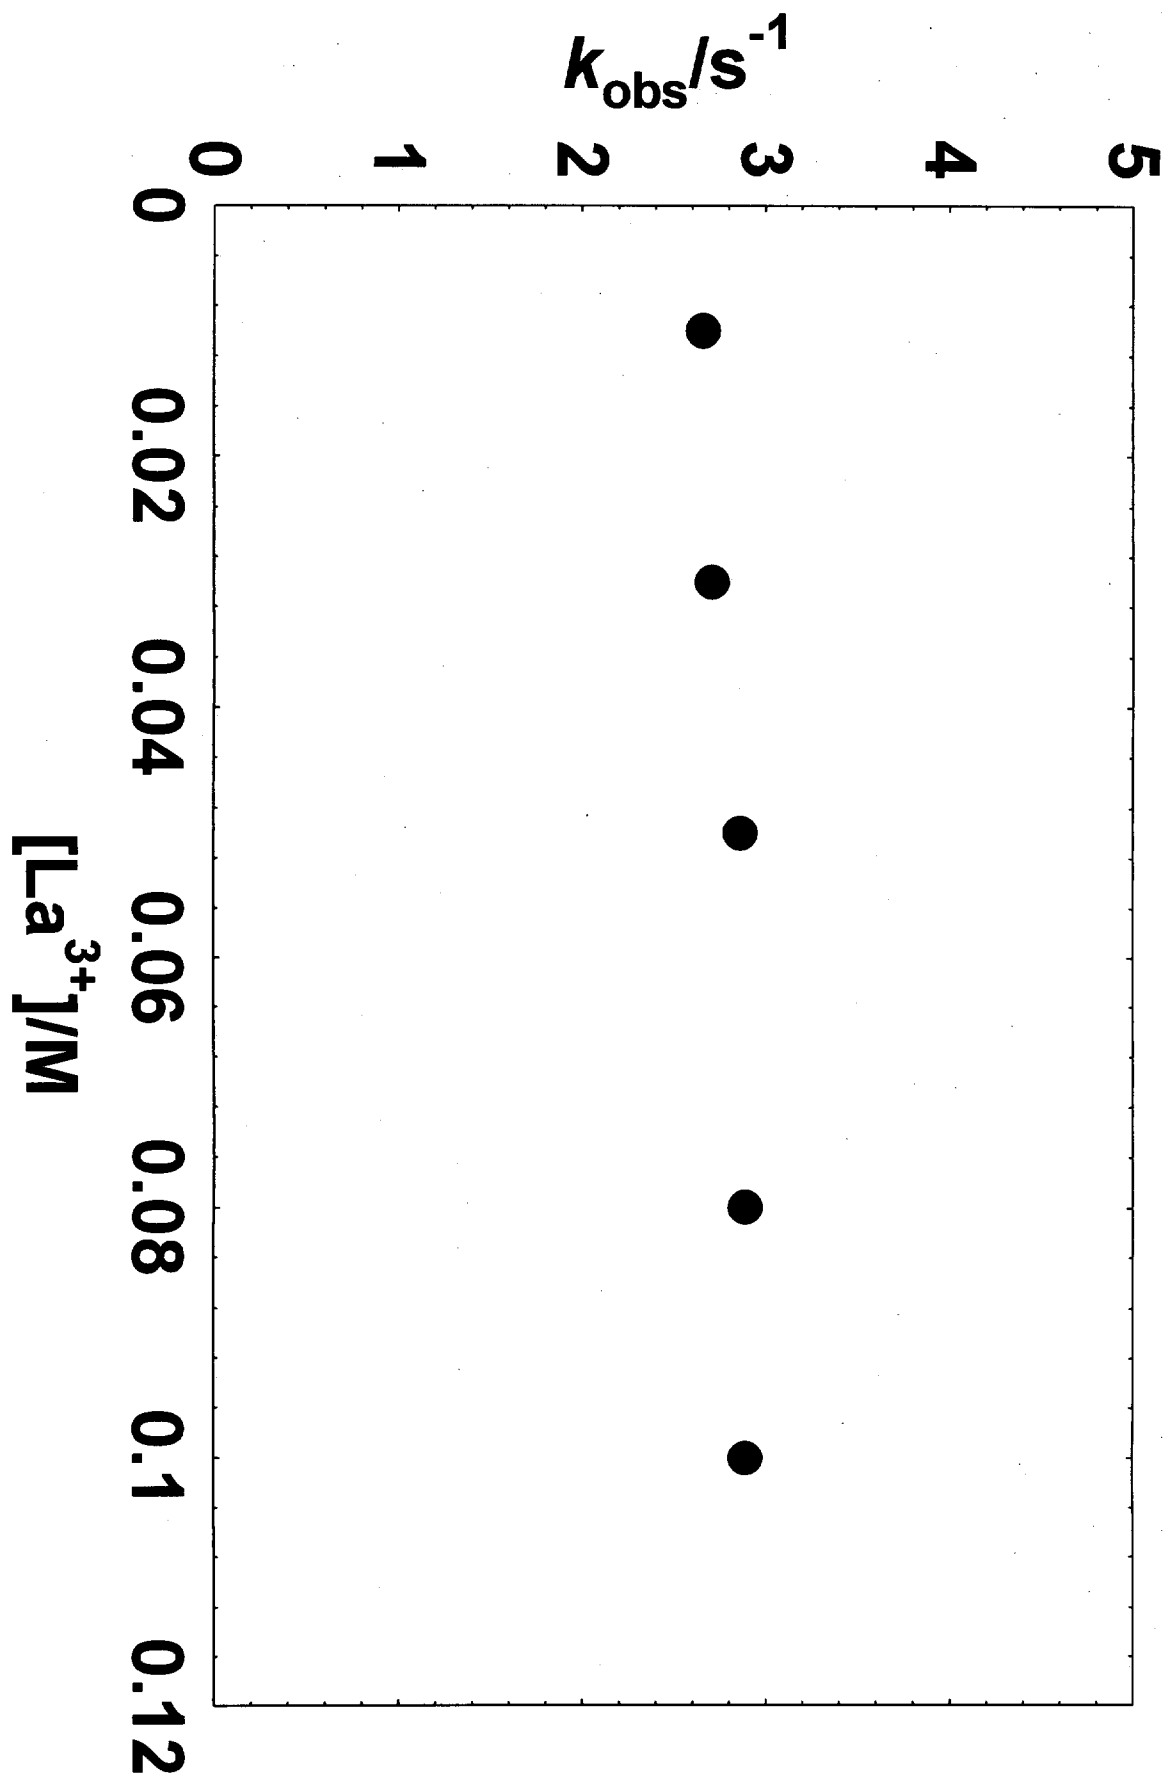

S8

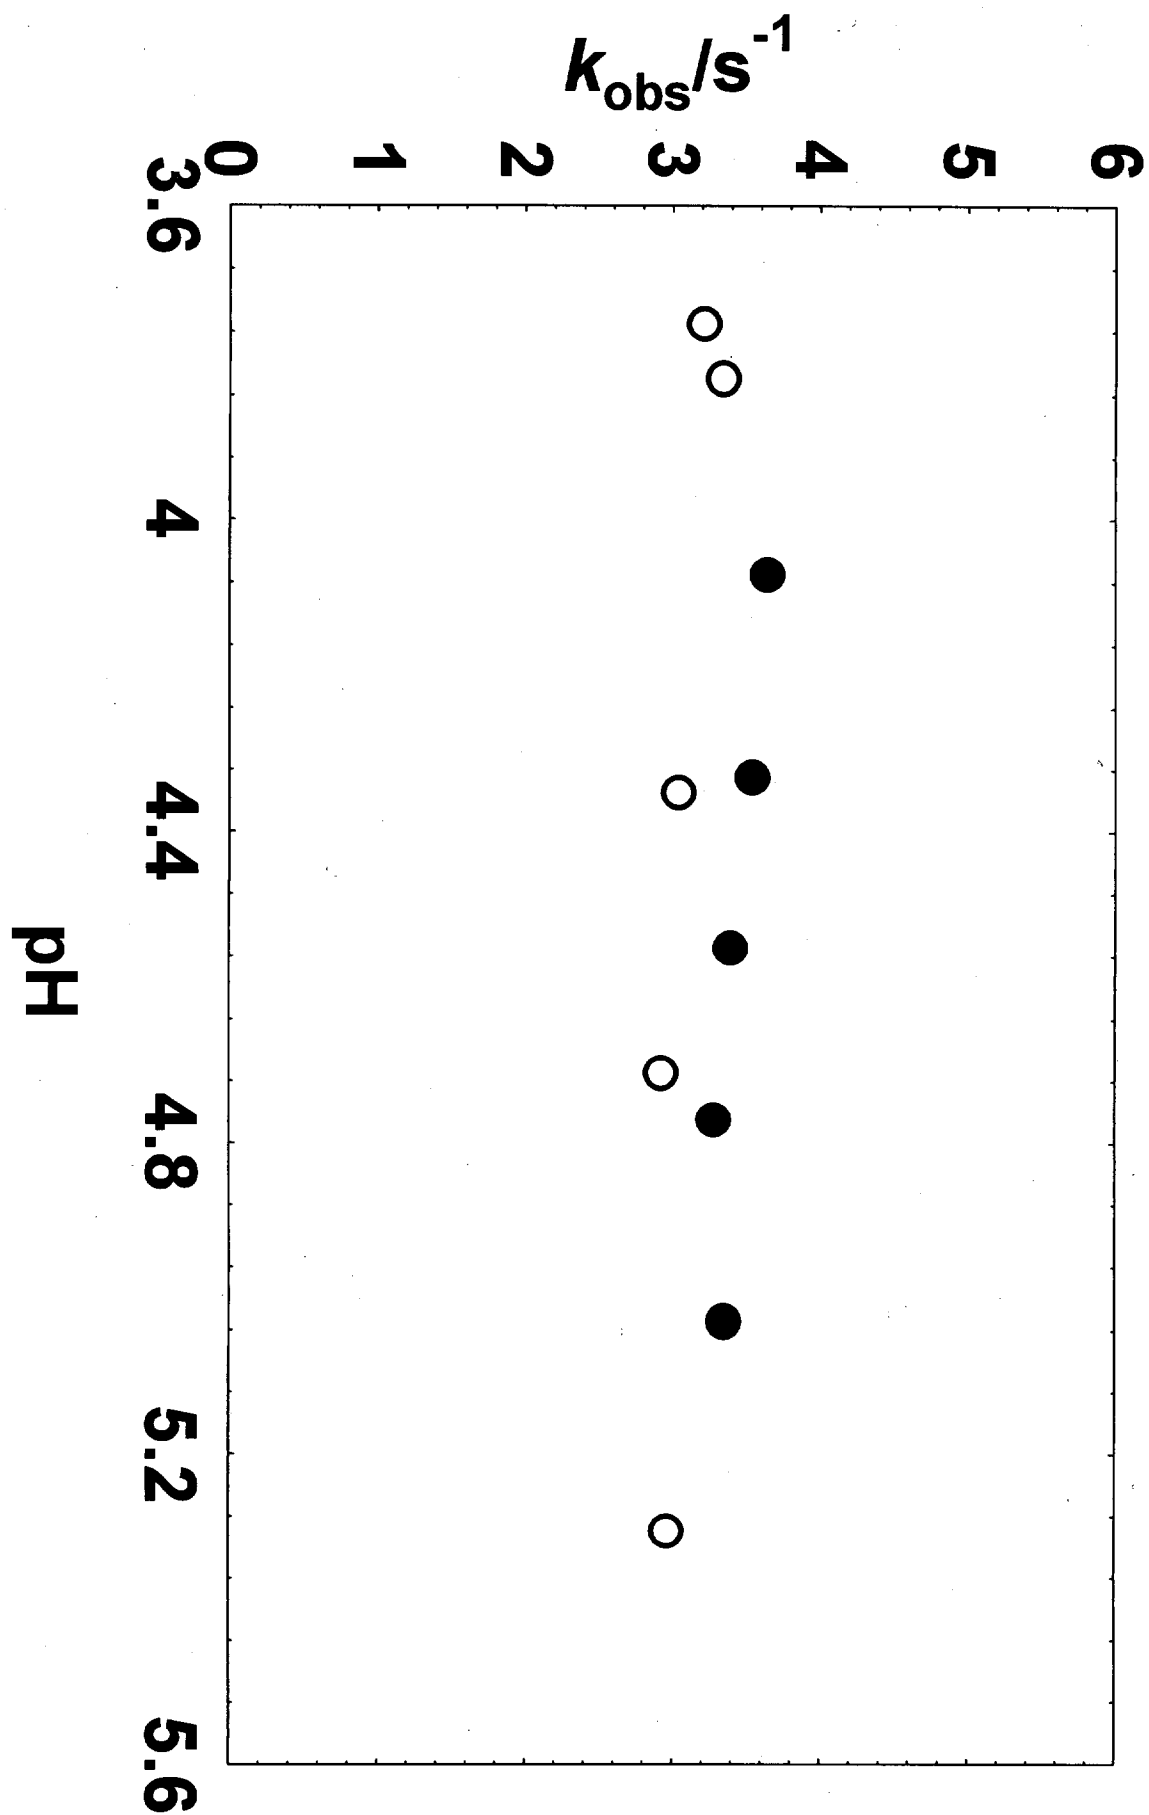

Fig. S6



S9

Fig. S7

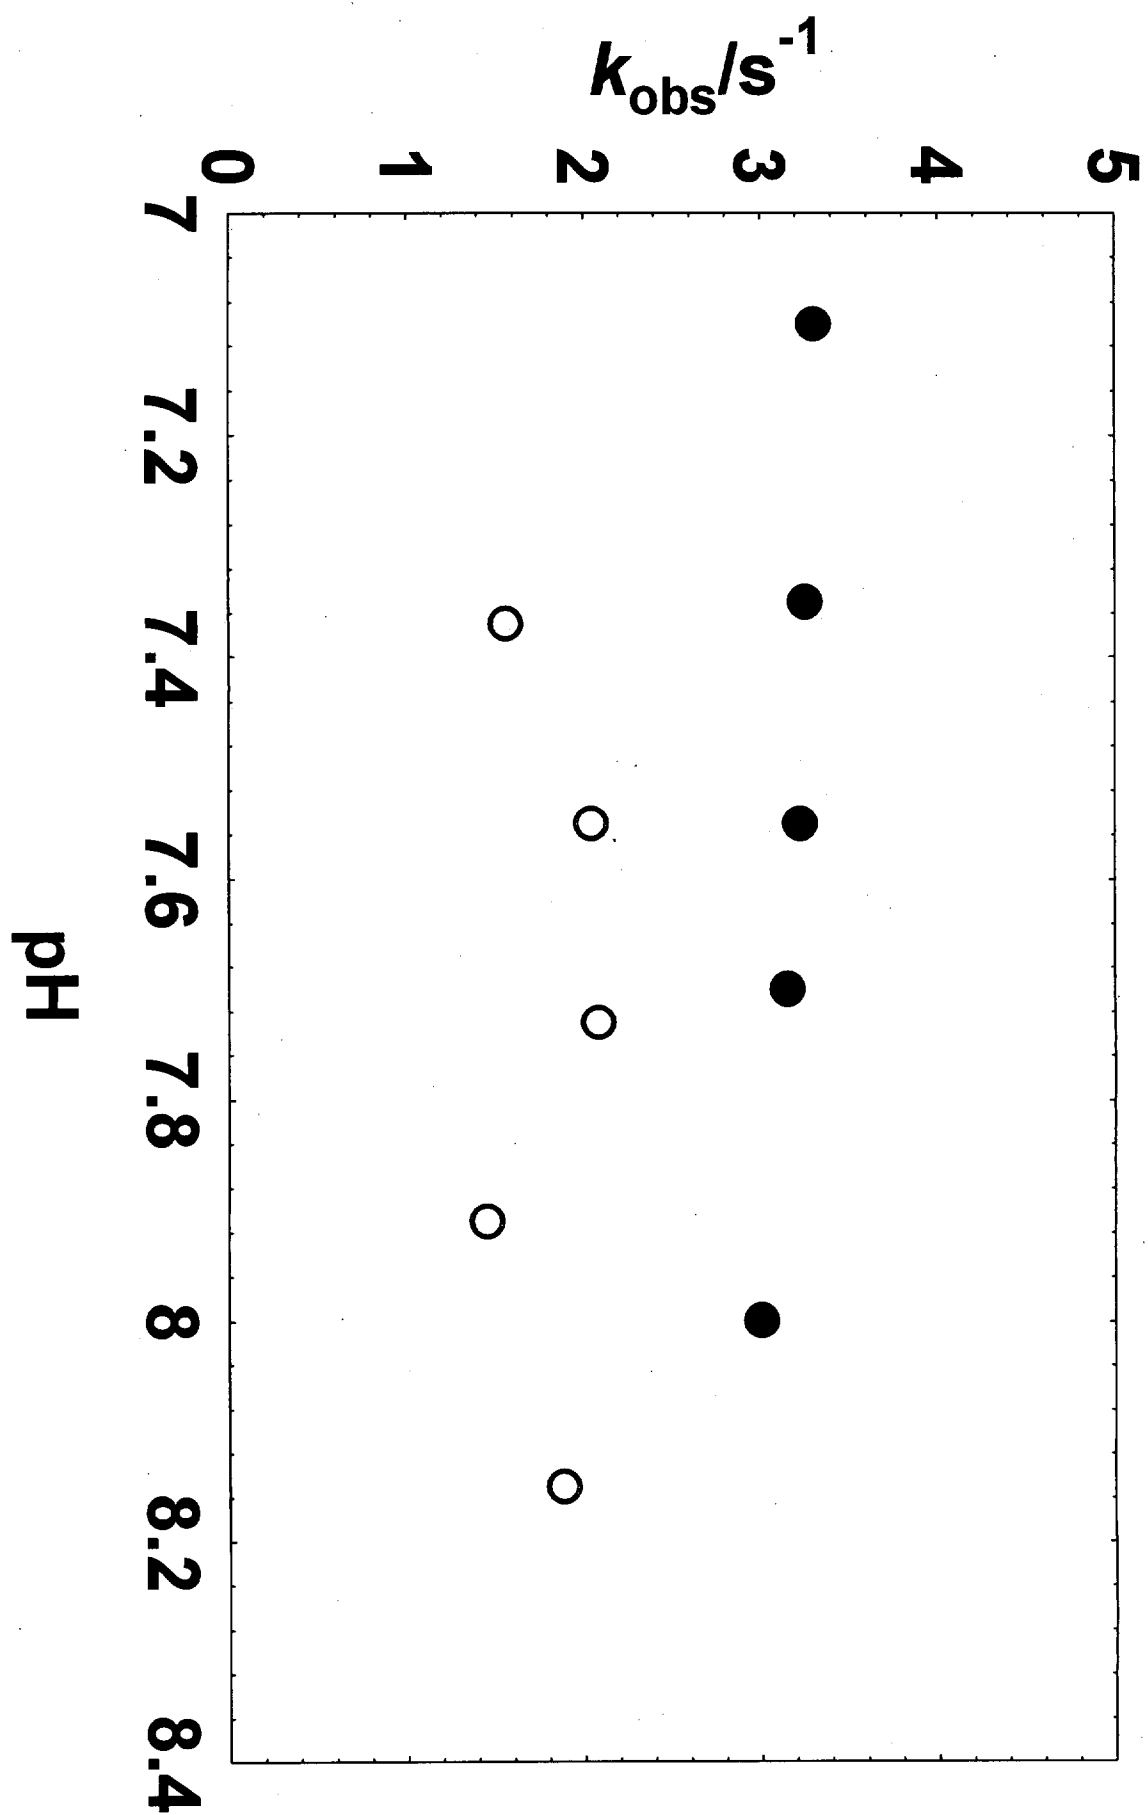

S10

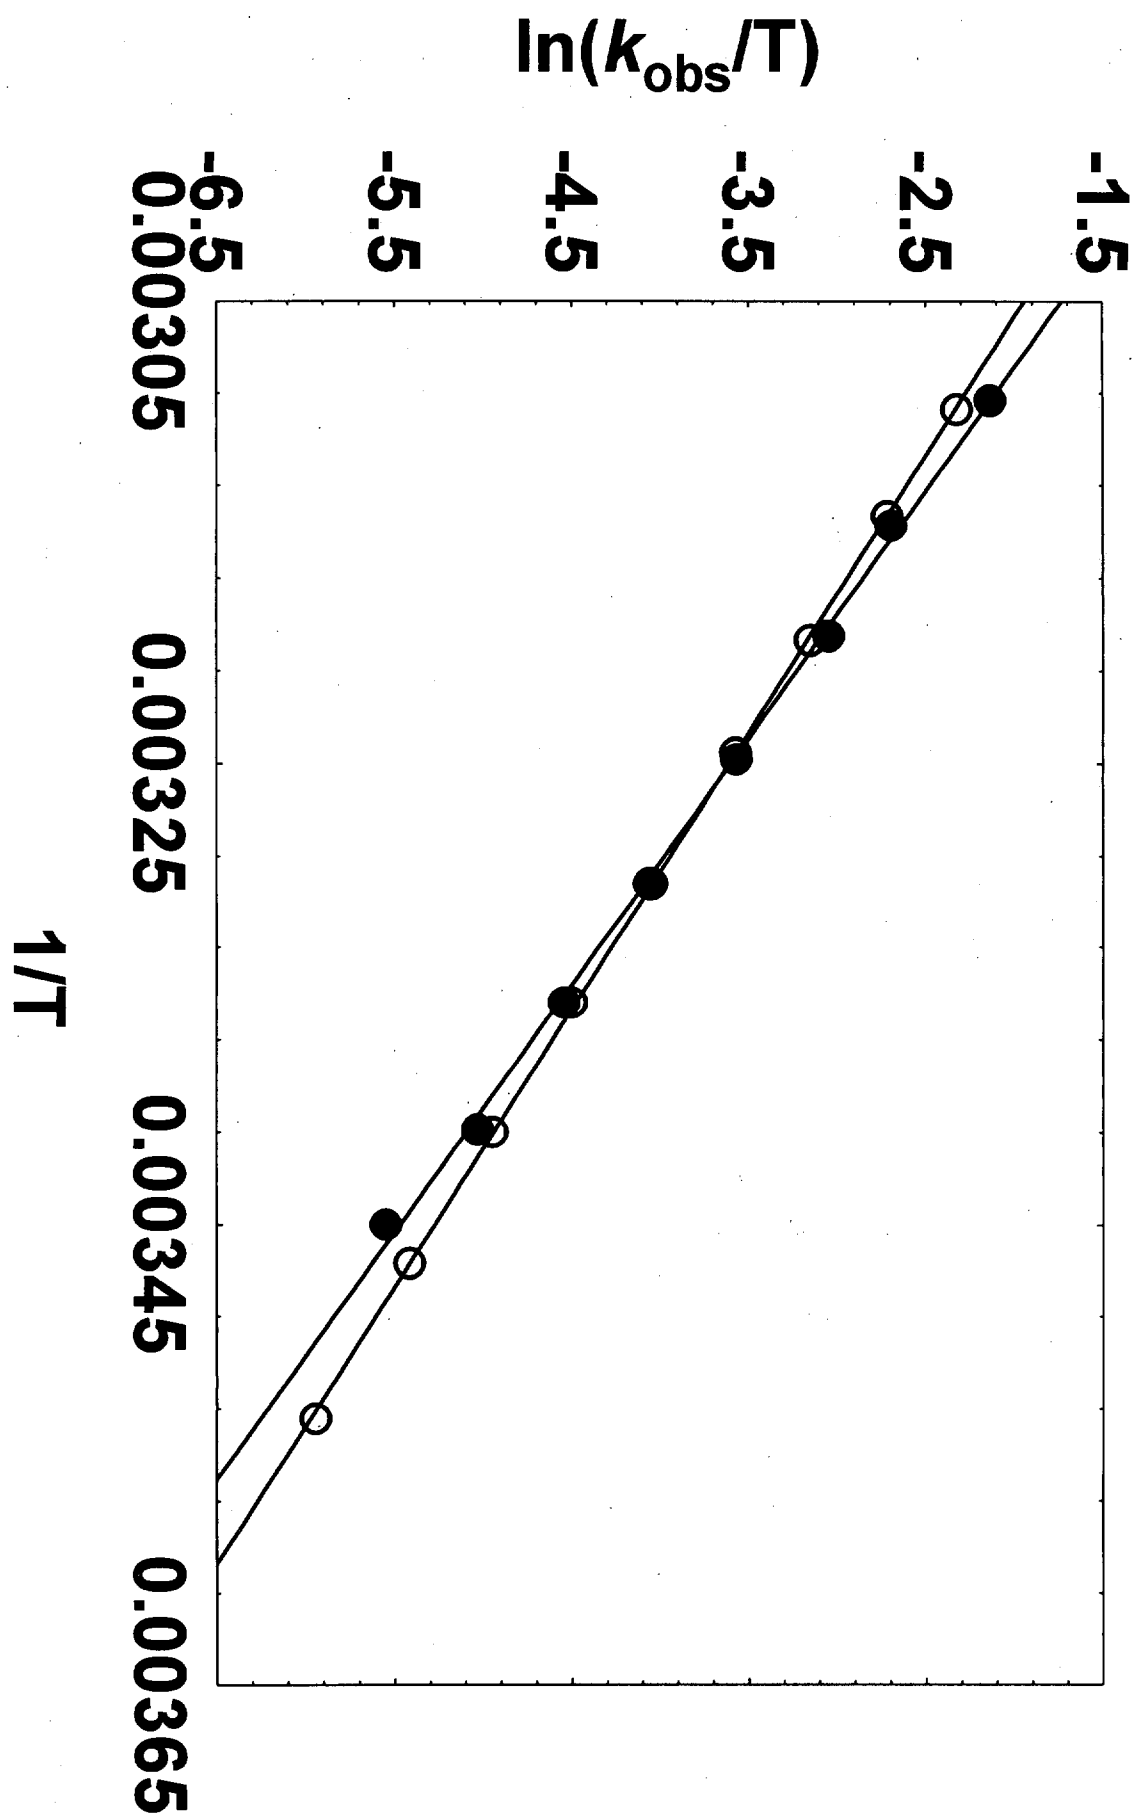

S11

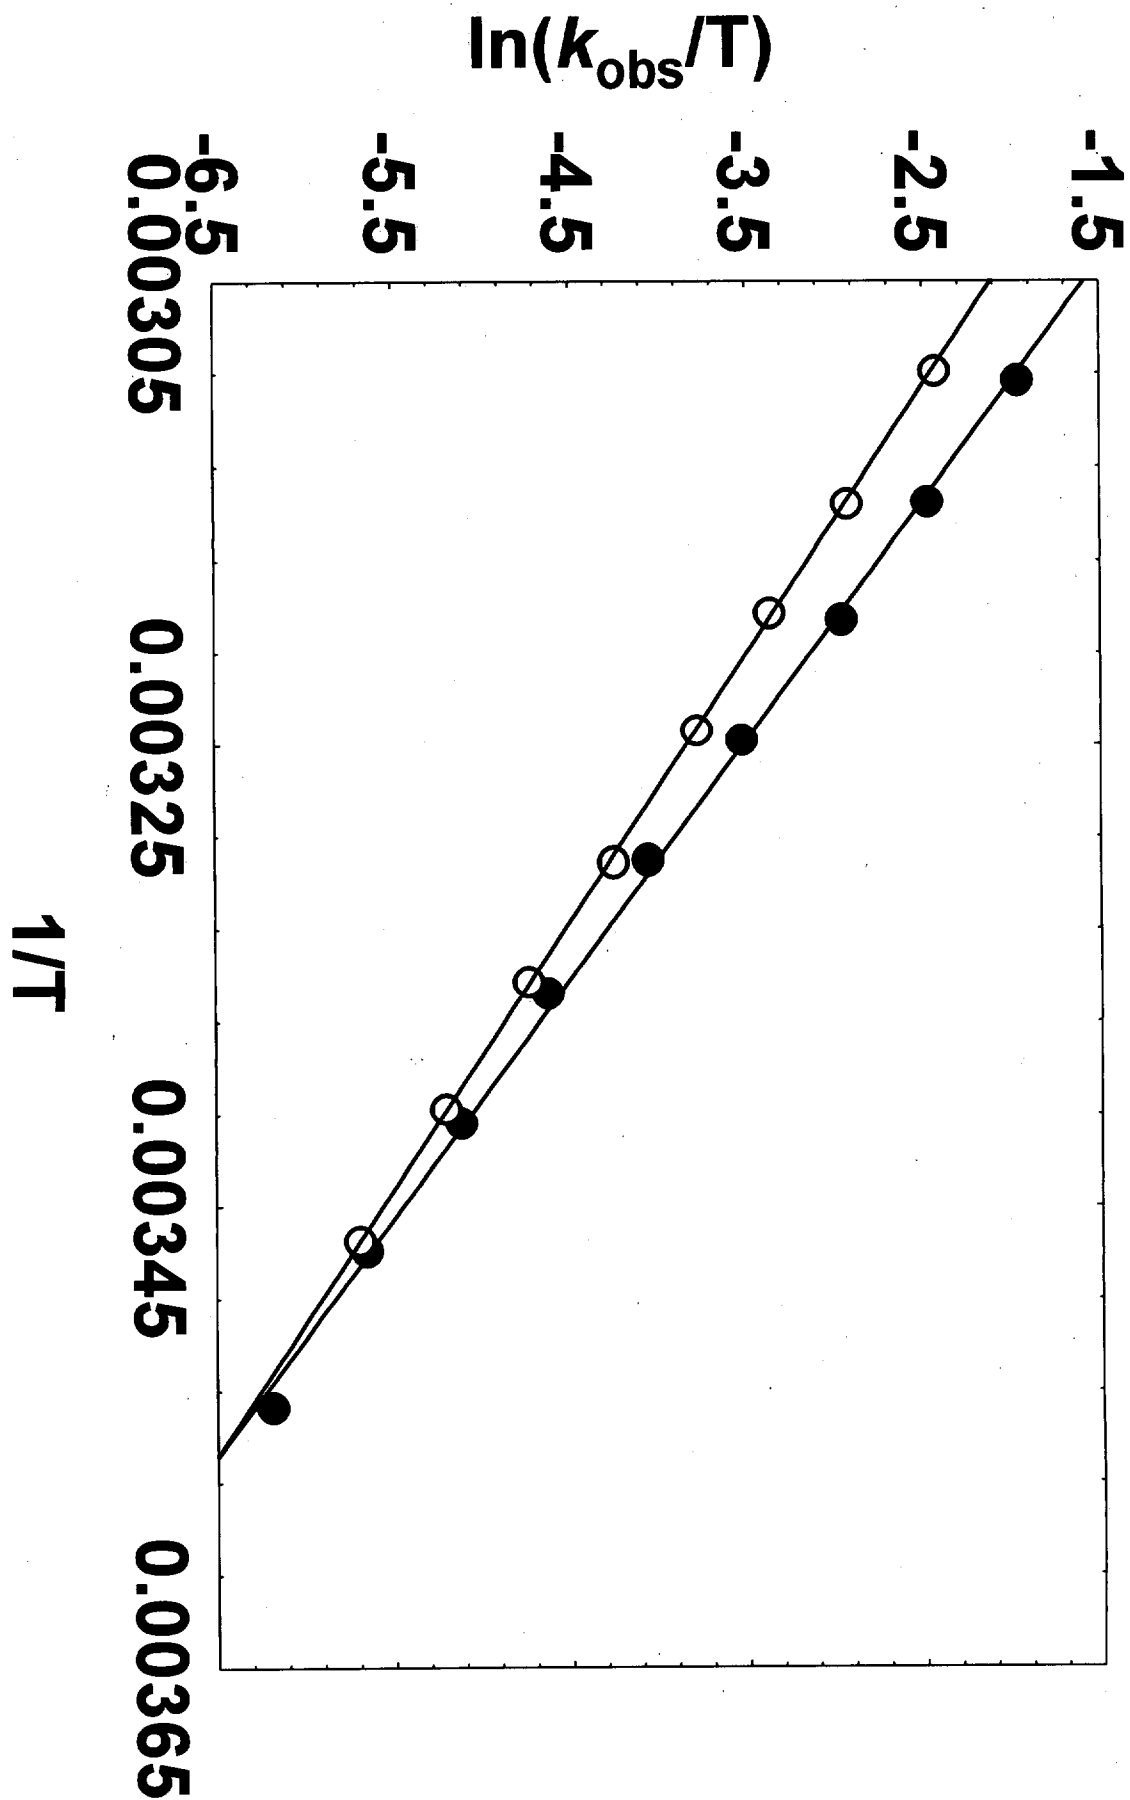

Fig. S9

S12

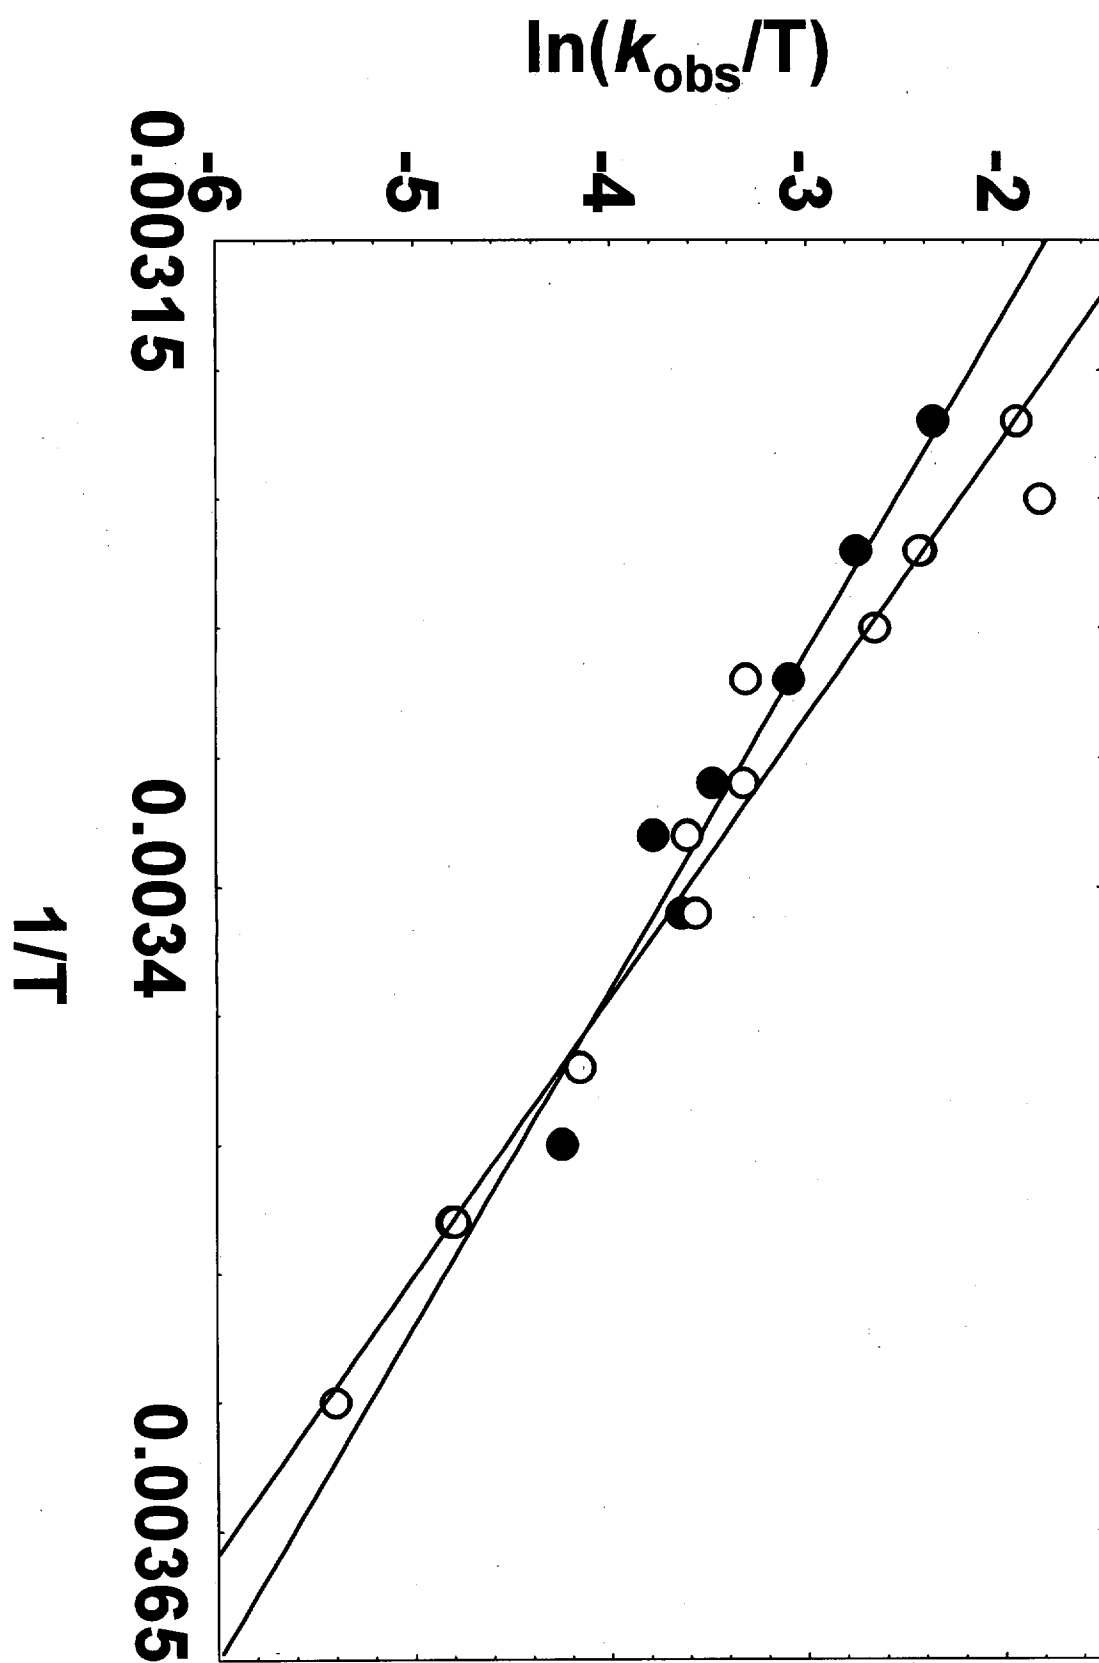

Fig. S10
